# Supplementary material for: A new phase in the decomposition of Mg(BH4)2: first-principles simulated annealing
Source: Royal Society of Chemistry journal article supplement (doi:10.1039/b908821k), 2009-01-01
Supplement: b908821k-thermodynamic_data.dat [file b908821k-thermodynamic_data.dat]

	Mg		-1.5236	BR Boor		-6.6870	MgB2		-15.3790	MgH2		-8.9829	MgB2H6 layer		-37.1913	alpha Mg(BH4)2		-44.7946	H2 gas		-6.8030
			0.0300			0.1260			0.2600			0.4020			1.7082			2.2188			0.2770
T (K)	Evib(ev/fu)	Svib(eV/Kfu)	F(eV/fu)	Evib(ev/fu)	Svib(eV/Kfu)	F(eV/fu)	Evib(ev/fu)	Svib(eV/Kfu)	F(eV/fu)	Evib(ev/fu)	Svib(eV/Kfu)	F(eV/fu)	Evib(ev/fu)	Svib(eV/Kfu)	F(eV/fu)	Evib(ev/fu)	Svib(eV/Kfu)	F(eV/fu)	H-E(eV/fu)	S(eV/Kfu)	G(eV/fu)
0	0.0000	0.0000	-1.4936	0.0000	0.0000	-6.5610	0.0000	0.0000	-15.1189	0.0000	0.0000	-8.5809	0.0000	0.0000	-35.4831	0.0000	0.0000	-42.5758	0.0000	0.0000	-6.5260
20	0.0000	0.0000	-1.4936	0.0000	0.0000	-6.5610	0.0000	0.0000	-15.1190	0.0000	0.0000	-8.5809	0.0003	0.0000	-35.4834	0.0003	0.0000	-42.5760	0.0037	0.0001	-6.5250
40	0.0004	0.0000	-1.4937	0.0000	0.0000	-6.5610	0.0001	0.0000	-15.1190	0.0001	0.0000	-8.5810	0.0019	0.0001	-35.4845	0.0020	0.0001	-42.5770	0.0094	0.0003	-6.5296
60	0.0016	0.0000	-1.4942	0.0000	0.0000	-6.5610	0.0005	0.0000	-15.1191	0.0005	0.0000	-8.5811	0.0052	0.0001	-35.4868	0.0059	0.0002	-42.5793	0.0163	0.0005	-6.5418
80	0.0039	0.0001	-1.4953	0.0001	0.0000	-6.5610	0.0015	0.0000	-15.1195	0.0015	0.0000	-8.5814	0.0102	0.0002	-35.4905	0.0121	0.0002	-42.5833	0.0237	0.0007	-6.5613
100	0.0070	0.0001	-1.4970	0.0003	0.0000	-6.5611	0.0034	0.0000	-15.1202	0.0034	0.0000	-8.5821	0.0167	0.0003	-35.4956	0.0205	0.0003	-42.5891	0.0309	0.0009	-6.5854
120	0.0106	0.0001	-1.4994	0.0006	0.0000	-6.5612	0.0064	0.0001	-15.1213	0.0064	0.0001	-8.5833	0.0247	0.0004	-35.5021	0.0310	0.0004	-42.5969	0.0373	0.0010	-6.6099
140	0.0145	0.0002	-1.5024	0.0011	0.0000	-6.5613	0.0103	0.0001	-15.1231	0.0103	0.0001	-8.5851	0.0340	0.0004	-35.5101	0.0432	0.0005	-42.6065	0.0431	0.0011	-6.6324
160	0.0187	0.0002	-1.5061	0.0018	0.0000	-6.5616	0.0153	0.0001	-15.1255	0.0153	0.0001	-8.5875	0.0446	0.0005	-35.5196	0.0570	0.0006	-42.6180	0.0485	0.0011	-6.6521
180	0.0231	0.0002	-1.5102	0.0027	0.0000	-6.5619	0.0212	0.0002	-15.1286	0.0212	0.0002	-8.5905	0.0564	0.0006	-35.5304	0.0723	0.0007	-42.6313	0.0536	0.0011	-6.6695
200	0.0277	0.0002	-1.5149	0.0039	0.0000	-6.5624	0.0280	0.0002	-15.1324	0.0280	0.0002	-8.5943	0.0694	0.0006	-35.5426	0.0889	0.0008	-42.6463	0.0589	0.0011	-6.6866
220	0.0323	0.0003	-1.5200	0.0053	0.0000	-6.5630	0.0356	0.0002	-15.1369	0.0356	0.0002	-8.5988	0.0835	0.0007	-35.5562	0.1068	0.0009	-42.6631	0.0644	0.0011	-6.7057
240	0.0370	0.0003	-1.5255	0.0069	0.0000	-6.5637	0.0439	0.0003	-15.1421	0.0439	0.0003	-8.6040	0.0987	0.0008	-35.5711	0.1258	0.0010	-42.6816	0.0702	0.0011	-6.7274
260	0.0418	0.0003	-1.5315	0.0088	0.0000	-6.5646	0.0528	0.0003	-15.1480	0.0528	0.0003	-8.6100	0.1150	0.0008	-35.5873	0.1460	0.0010	-42.7017	0.0761	0.0012	-6.7512
280	0.0467	0.0003	-1.5378	0.0109	0.0001	-6.5657	0.0624	0.0004	-15.1547	0.0624	0.0004	-8.6166	0.1322	0.0009	-35.6048	0.1672	0.0011	-42.7234	0.0821	0.0012	-6.7766
300	0.0516	0.0003	-1.5444	0.0132	0.0001	-6.5669	0.0725	0.0004	-15.1620	0.0725	0.0004	-8.6240	0.1505	0.0010	-35.6235	0.1894	0.0012	-42.7467	0.0882	0.0012	-6.8027
320	0.0565	0.0004	-1.5514	0.0158	0.0001	-6.5682	0.0830	0.0004	-15.1701	0.0830	0.0004	-8.6320	0.1697	0.0010	-35.6436	0.2126	0.0013	-42.7714	0.0942	0.0012	-6.8284
340	0.0615	0.0004	-1.5587	0.0184	0.0001	-6.5697	0.0940	0.0005	-15.1788	0.0940	0.0005	-8.6408	0.1898	0.0011	-35.6648	0.2369	0.0013	-42.7977	0.1002	0.0013	-6.8537
360	0.0664	0.0004	-1.5663	0.0213	0.0001	-6.5714	0.1053	0.0005	-15.1882	0.1053	0.0005	-8.6501	0.2108	0.0012	-35.6873	0.2620	0.0014	-42.8254	0.1062	0.0013	-6.8787
380	0.0714	0.0004	-1.5742	0.0243	0.0001	-6.5732	0.1170	0.0005	-15.1982	0.1170	0.0005	-8.6601	0.2327	0.0012	-35.7109	0.2881	0.0015	-42.8545	0.1122	0.0013	-6.9036
400	0.0764	0.0004	-1.5823	0.0275	0.0001	-6.5752	0.1290	0.0005	-15.2088	0.1290	0.0005	-8.6708	0.2553	0.0013	-35.7357	0.3150	0.0016	-42.8850	0.1182	0.0013	-6.9288
420	0.0815	0.0004	-1.5907	0.0308	0.0001	-6.5774	0.1412	0.0006	-15.2201	0.1412	0.0006	-8.6820	0.2788	0.0013	-35.7617	0.3428	0.0016	-42.9169	0.1242	0.0013	-6.9545
440	0.0865	0.0004	-1.5993	0.0342	0.0001	-6.5797	0.1537	0.0006	-15.2319	0.1537	0.0006	-8.6938	0.3029	0.0014	-35.7888	0.3715	0.0017	-42.9502	0.1302	0.0013	-6.9809
460	0.0916	0.0004	-1.6081	0.0377	0.0001	-6.5822	0.1664	0.0006	-15.2443	0.1664	0.0006	-8.7063	0.3279	0.0014	-35.8170	0.4009	0.0018	-42.9847	0.1362	0.0013	-7.0077
480	0.0966	0.0005	-1.6172	0.0413	0.0001	-6.5849	0.1793	0.0007	-15.2573	0.1793	0.0007	-8.7192	0.3535	0.0015	-35.8463	0.4312	0.0018	-43.0206	0.1423	0.0014	-7.0350
500	0.1017	0.0005	-1.6265	0.0450	0.0001	-6.5877	0.1924	0.0007	-15.2708	0.1924	0.0007	-8.7327	0.3798	0.0015	-35.8767	0.4622	0.0019	-43.0577	0.1483	0.0014	-7.0625
520	0.1068	0.0005	-1.6360	0.0488	0.0002	-6.5906	0.2056	0.0007	-15.2848	0.2056	0.0007	-8.7467	0.4067	0.0016	-35.9082	0.4939	0.0020	-43.0961	0.1543	0.0014	-7.0901
540	0.1118	0.0005	-1.6456	0.0527	0.0002	-6.5937	0.2190	0.0007	-15.2993	0.2190	0.0007	-8.7613	0.4343	0.0017	-35.9407	0.5264	0.0020	-43.1357	0.1604	0.0014	-7.1179
560	0.1169	0.0005	-1.6555	0.0567	0.0002	-6.5969	0.2325	0.0008	-15.3144	0.2325	0.0008	-8.7763	0.4624	0.0017	-35.9743	0.5596	0.0021	-43.1765	0.1664	0.0014	-7.1459
580	0.1220	0.0005	-1.6656	0.0607	0.0002	-6.6003	0.2462	0.0008	-15.3299	0.2462	0.0008	-8.7919	0.4912	0.0018	-36.0088	0.5934	0.0021	-43.2186	0.1724	0.0014	-7.1740
600	0.1271	0.0005	-1.6758	0.0648	0.0002	-6.6038	0.2599	0.0008	-15.3459	0.2599	0.0008	-8.8079	0.5205	0.0018	-36.0444	0.6280	0.0022	-43.2618	0.1785	0.0014	-7.2023
620	0.1322	0.0005	-1.6862	0.0690	0.0002	-6.6075	0.2738	0.0008	-15.3623	0.2738	0.0008	-8.8243	0.5503	0.0019	-36.0809	0.6631	0.0022	-43.3062	0.1845	0.0014	-7.2308
640	0.1374	0.0005	-1.6967	0.0732	0.0002	-6.6113	0.2877	0.0009	-15.3793	0.2877	0.0009	-8.8412	0.5807	0.0019	-36.1185	0.6989	0.0023	-43.3517	0.1905	0.0014	-7.2596
660	0.1425	0.0005	-1.7075	0.0774	0.0002	-6.6152	0.3018	0.0009	-15.3966	0.3018	0.0009	-8.8586	0.6116	0.0019	-36.1569	0.7353	0.0024	-43.3983	0.1966	0.0015	-7.2886
680	0.1476	0.0005	-1.7183	0.0817	0.0002	-6.6192	0.3159	0.0009	-15.4144	0.3159	0.0009	-8.8763	0.6429	0.0020	-36.1964	0.7723	0.0024	-43.4461	0.2026	0.0015	-7.3178
700	0.1527	0.0006	-1.7293	0.0860	0.0002	-6.6234	0.3301	0.0009	-15.4326	0.3301	0.0009	-8.8945	0.6748	0.0020	-36.2367	0.8098	0.0025	-43.4950	0.2086	0.0015	-7.3472
720	0.1578	0.0006	-1.7405	0.0904	0.0002	-6.6277	0.3443	0.0009	-15.4511	0.3443	0.0009	-8.9131	0.7070	0.0021	-36.2780	0.8479	0.0025	-43.5449	0.2146	0.0015	-7.3767
740	0.1630	0.0006	-1.7518	0.0948	0.0002	-6.6322	0.3586	0.0010	-15.4701	0.3586	0.0010	-8.9321	0.7397	0.0021	-36.3202	0.8865	0.0026	-43.5959	0.2207	0.0015	-7.4064
760	0.1681	0.0006	-1.7633	0.0993	0.0002	-6.6367	0.3730	0.0010	-15.4895	0.3730	0.0010	-8.9515	0.7729	0.0022	-36.3632	0.9257	0.0026	-43.6480	0.2267	0.0015	-7.4362
780	0.1732	0.0006	-1.7749	0.1038	0.0002	-6.6414	0.3875	0.0010	-15.5093	0.3875	0.0010	-8.9712	0.8064	0.0022	-36.4072	0.9653	0.0027	-43.7010	0.2327	0.0015	-7.4662
800	0.1783	0.0006	-1.7866	0.1083	0.0002	-6.6461	0.4019	0.0010	-15.5294	0.4019	0.0010	-8.9914	0.8403	0.0023	-36.4520	1.0054	0.0027	-43.7552	0.2388	0.0015	-7.4963
820	0.1835	0.0006	-1.7984	0.1128	0.0002	-6.6510	0.4165	0.0010	-15.5499	0.4165	0.0010	-9.0118	0.8746	0.0023	-36.4976	1.0460	0.0028	-43.8103	0.2448	0.0015	-7.5266
840	0.1886	0.0006	-1.8104	0.1174	0.0003	-6.6560	0.4310	0.0011	-15.5707	0.4310	0.0011	-9.0327	0.9093	0.0023	-36.5441	1.0870	0.0028	-43.8664	0.2508	0.0015	-7.5571
860	0.1938	0.0006	-1.8225	0.1220	0.0003	-6.6611	0.4456	0.0011	-15.5919	0.4456	0.0011	-9.0539	0.9443	0.0024	-36.5914	1.1285	0.0029	-43.9235	0.2568	0.0015	-7.5877
880	0.1989	0.0006	-1.8347	0.1266	0.0003	-6.6664	0.4603	0.0011	-15.6135	0.4603	0.0011	-9.0754	0.9796	0.0024	-36.6396	1.1704	0.0029	-43.9816	0.2629	0.0015	-7.6184
900	0.2040	0.0006	-1.8470	0.1313	0.0003	-6.6717	0.4750	0.0011	-15.6353	0.4750	0.0011	-9.0973	1.0153	0.0025	-36.6885	1.2128	0.0030	-44.0406	0.2689	0.0015	-7.6493
920	0.2092	0.0006	-1.8595	0.1359	0.0003	-6.6771	0.4897	0.0011	-15.6575	0.4897	0.0011	-9.1195	1.0513	0.0025	-36.7383	1.2555	0.0030	-44.1006	0.2749	0.0016	-7.6803
940	0.2143	0.0006	-1.8720	0.1406	0.0003	-6.6827	0.5045	0.0011	-15.6800	0.5045	0.0011	-9.1420	1.0875	0.0025	-36.7888	1.2986	0.0031	-44.1615	0.2809	0.0016	-7.7114
960	0.2195	0.0006	-1.8847	0.1453	0.0003	-6.6883	0.5192	0.0011	-15.7028	0.5192	0.0011	-9.1648	1.1241	0.0026	-36.8401	1.3420	0.0031	-44.2233	0.2869	0.0016	-7.7427
980	0.2246	0.0006	-1.8975	0.1500	0.0003	-6.6940	0.5340	0.0012	-15.7260	0.5340	0.0012	-9.1879	1.1610	0.0026	-36.8922	1.3859	0.0032	-44.2860	0.2930	0.0016	-7.7741
1000	0.2298	0.0006	-1.9104	0.1548	0.0003	-6.6998	0.5489	0.0012	-15.7494	0.5489	0.0012	-9.2114	1.1981	0.0027	-36.9450	1.4300	0.0032	-44.3497	0.2990	0.0016	-7.8056
